# Supplementary material for: Comprehensive Flow Cytometry Profiling of the Immune System in COVID-19 Convalescent Individuals
Source: PubMed Central journal article supplement (PMC8771913; doi:10.3389/fimmu.2021.793142), 2022-01-06
Supplement: DataSheet_1.pdf [file DataSheet_1.pdf]

## Supplementary Material

### Supplemental S1

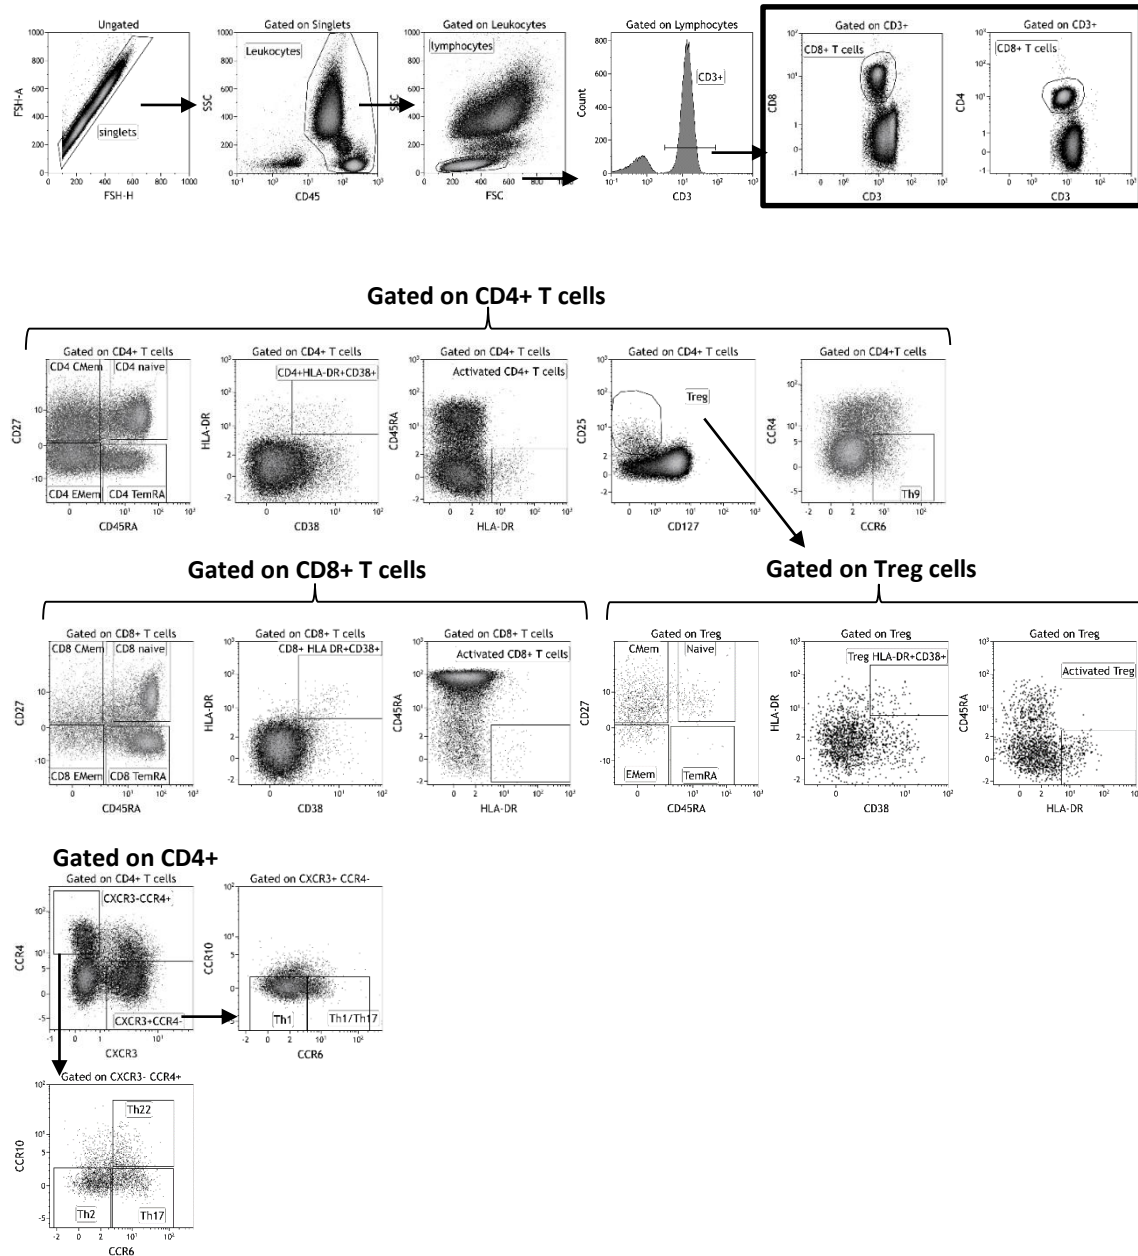

**Figure S1.** Traditional manual gating strategy for the analysis of the T-cell panel. Gating strategies to define T-cell subsets used in COV and CT-group individuals. Representative examples of flow cytometry plots determined on whole blood labeled from one individual.

Supplemental S2

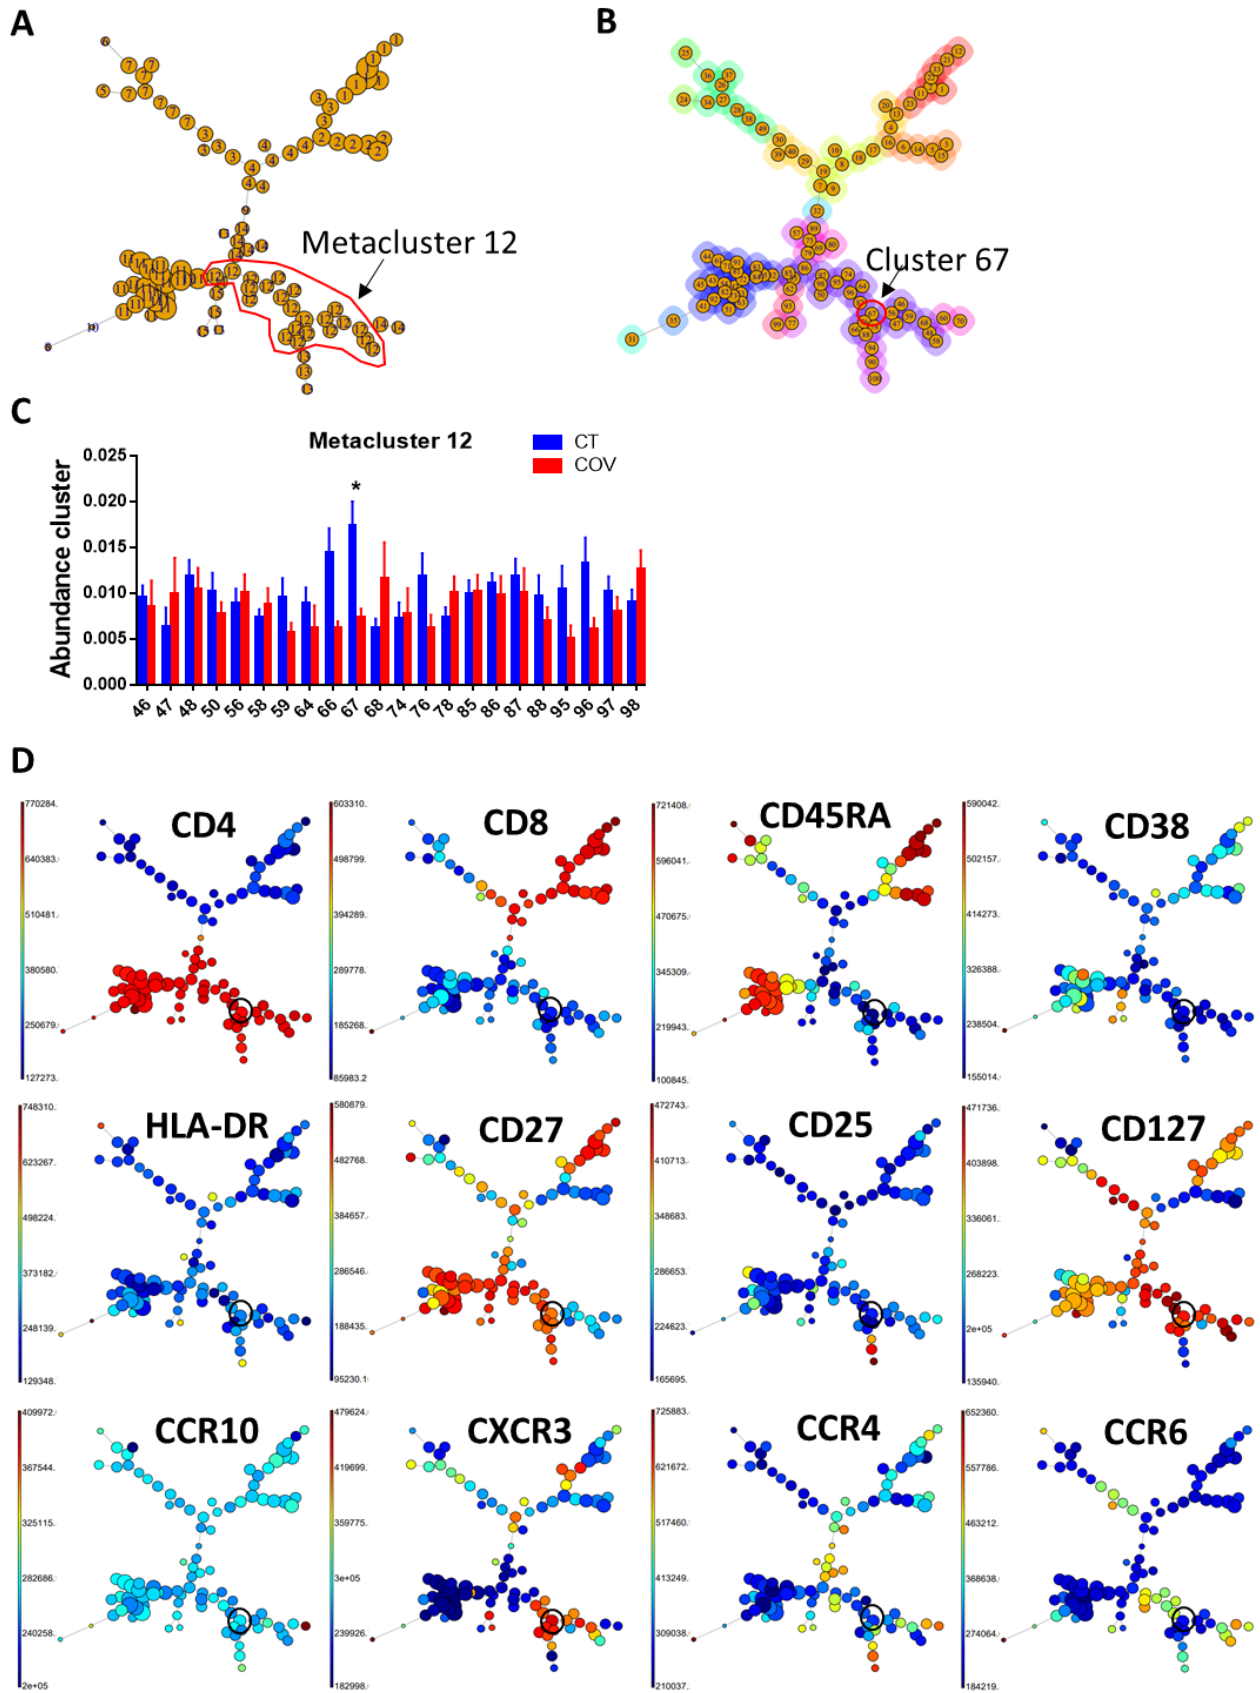

**Figure S2.** FlowSOM High-dimensional analysis of T cells cytometry panel subsets. **(A)** Tree graphical representation for the metaclusters obtained by FlowSOM analysis; metacluster 12 is bounded with a red line. **(B)** Tree graphical representation of the 15 metaclusters obtained by FlowSOM analysis. Each metacluster is in a different color. Cluster 67, the only cluster significantly different between groups in metacluster 12, is bounded with a red circle. **(C)** The abundance of clusters was obtained through FlowSOM analysis. Two-way ANOVA with Benjamini–Hochberg adjustment for multiple testing. Median  $\pm$  SEM.  $*p < 0.05$ . **(D)** Tree graphical representation shows all the markers' expressions (CD4, CD8, CD45RA, CD38, HLA-DR, CD27, CD25, CD127, CCR10, CXCR3, CCR4, and CCR6) of the T-cell panel after FlowSOM analysis. According to this graphic, cluster 67 was CD4<sup>+</sup> CD45RA<sup>neg</sup> CCR4<sup>neg</sup> CCR10<sup>neg</sup> CD27<sup>+</sup> CCR6<sup>neg</sup> CXCR3<sup>+</sup> CD127<sup>+</sup>. The color scale (left axis) represents the intensity of the marker's expression, with dark red for high-intensity expression and dark blue for no expression.

## Supplemental S3

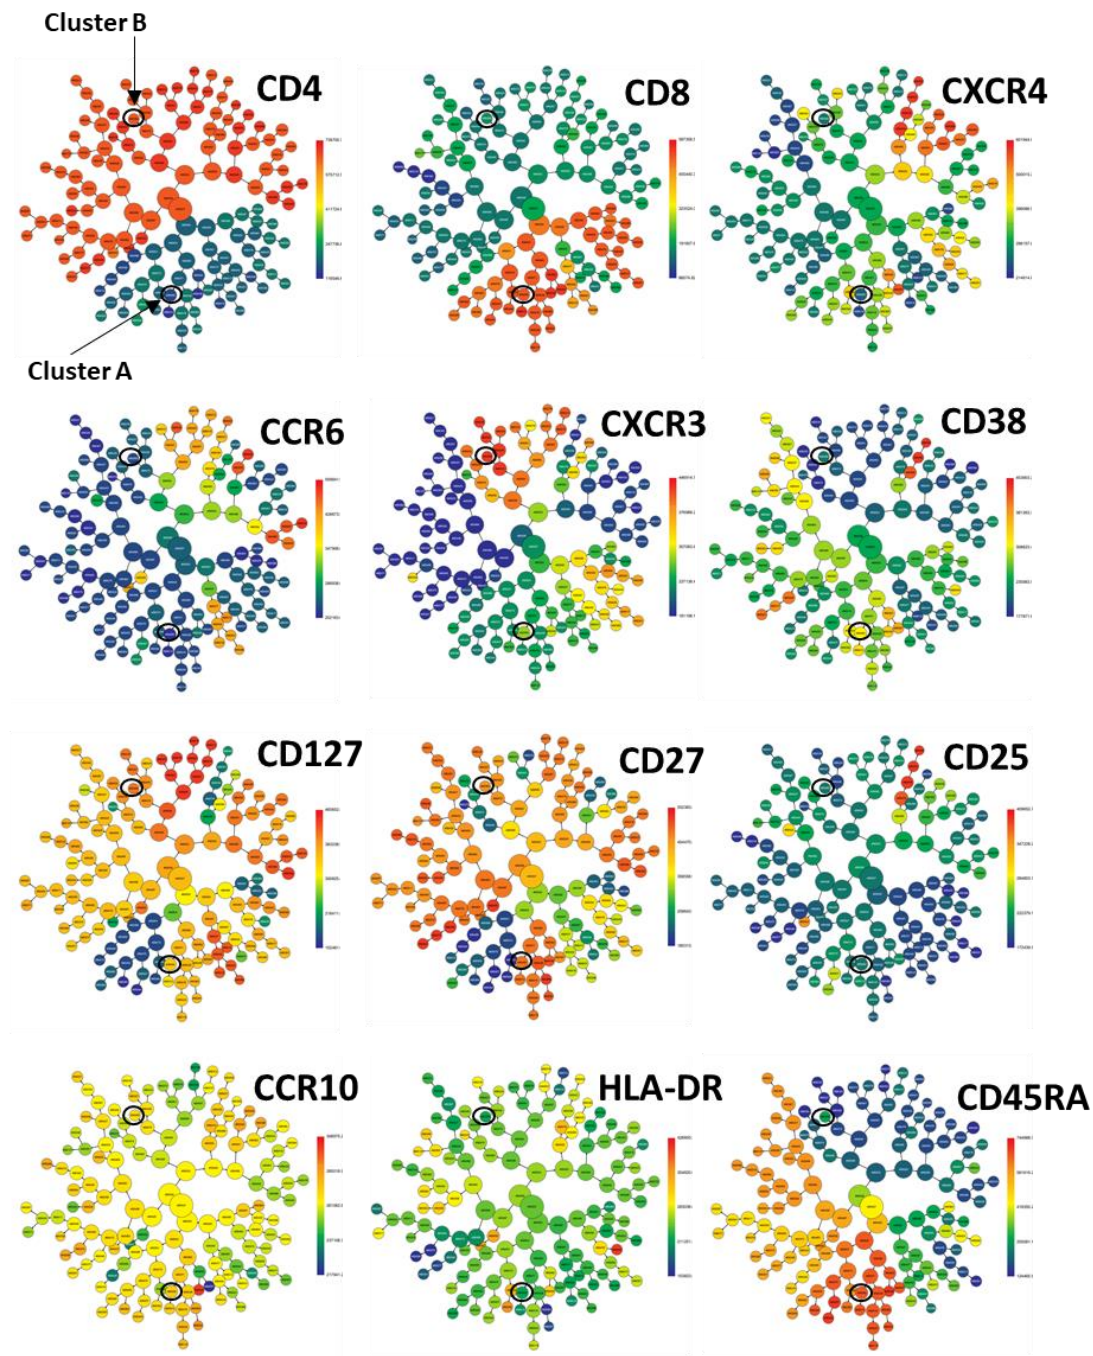

**Figure S3.** Graphics from CITRUS analysis of the T cell cytometry panel. Clusters A and B, depicted by black circles, were more abundant in the CT group than in the COV group. The tree graphical representation shows all the markers' expression (CD4, CD8, CD45RA, CD38, HLA-DR, CD27, CD25, CD127, CCR10, CXCR3, CCR4, and CCR6) of the T-cell panel. The color scale (right axis) represents the intensity of the marker expression, indicating positive expression in dark red and negative expression in dark blue. Clusters A and B are bounded with black circles. Cluster A expressed CD8<sup>+</sup> CD38<sup>+</sup> CD127<sup>+</sup> CD27<sup>+</sup> CCR10<sup>+</sup> and CD45RA<sup>+</sup> and cluster B expressed CD4<sup>+</sup> CXCR3<sup>+</sup> CD127<sup>+</sup> CD27<sup>+</sup> and CCR10<sup>+</sup>.

Supplemental S4

**A**

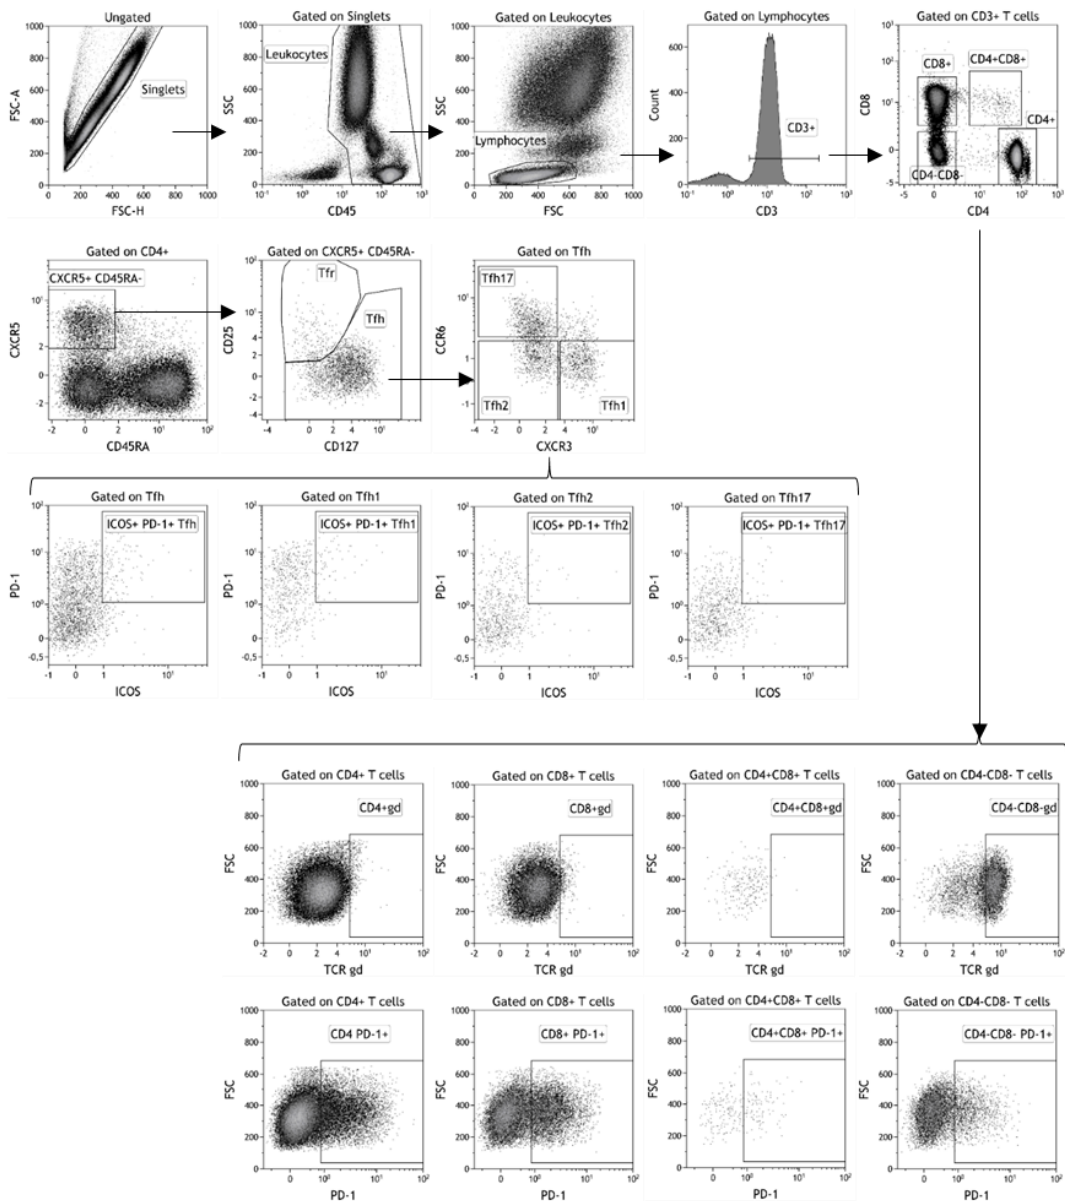

**B**

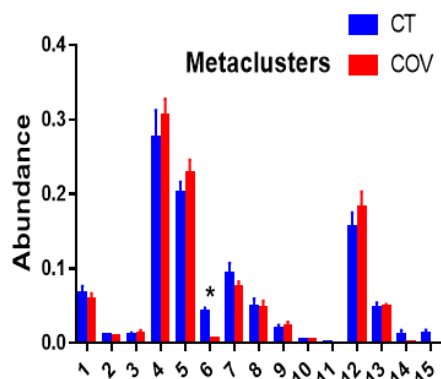

**C**

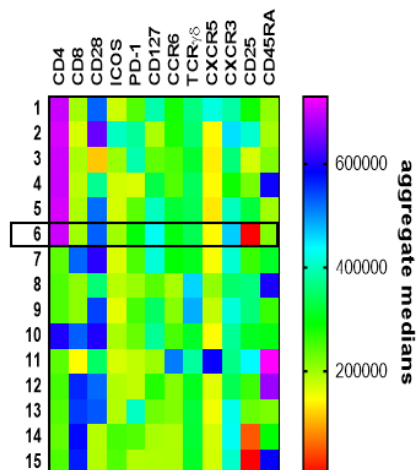

**Figure S4.** Manual gating strategy and high-dimensional analysis of the Tfh-T $\gamma\delta$  cell cytometry panel. **(A)** Gating strategies to define T-cell subsets used in COV and CT-group individuals. Representative examples of flow cytometry plots determined on whole blood labeled from one individual. **(B)** The abundance of metaclusters was obtained through FlowSOM analysis. Median  $\pm$  SEM,  $*p < 0.05$ . **(C)** Heat map from FlowSOM analysis of the aggregate medians for all the markers' intensity expression into the Tfh-T $\gamma\delta$  cell cytometry panel. On the Y-axis (left) are the 15 metaclusters' numbers, identified by FlowSOM, and on the X-axis (top) are all the studied markers. Red and purple indicate the minimum and maximum median intensity expression on the color scale on the right Y-axis, respectively. Metacluster 6, bounded with the black line, was the only metacluster identified as having a significantly greater abundance in the CT than in the COV group by two-way ANOVA with Benjamini-Hochberg adjustment for multiple testing

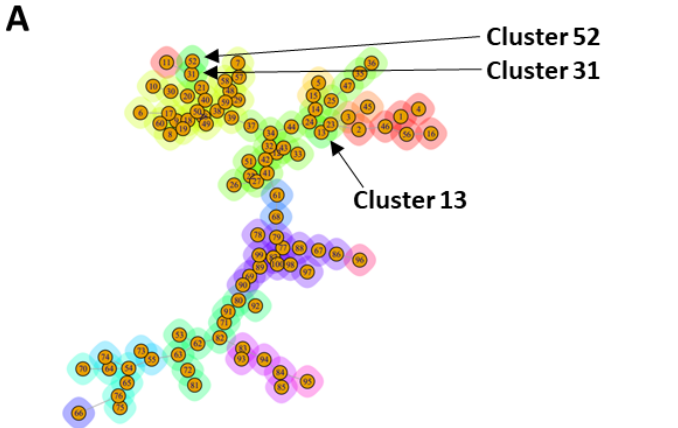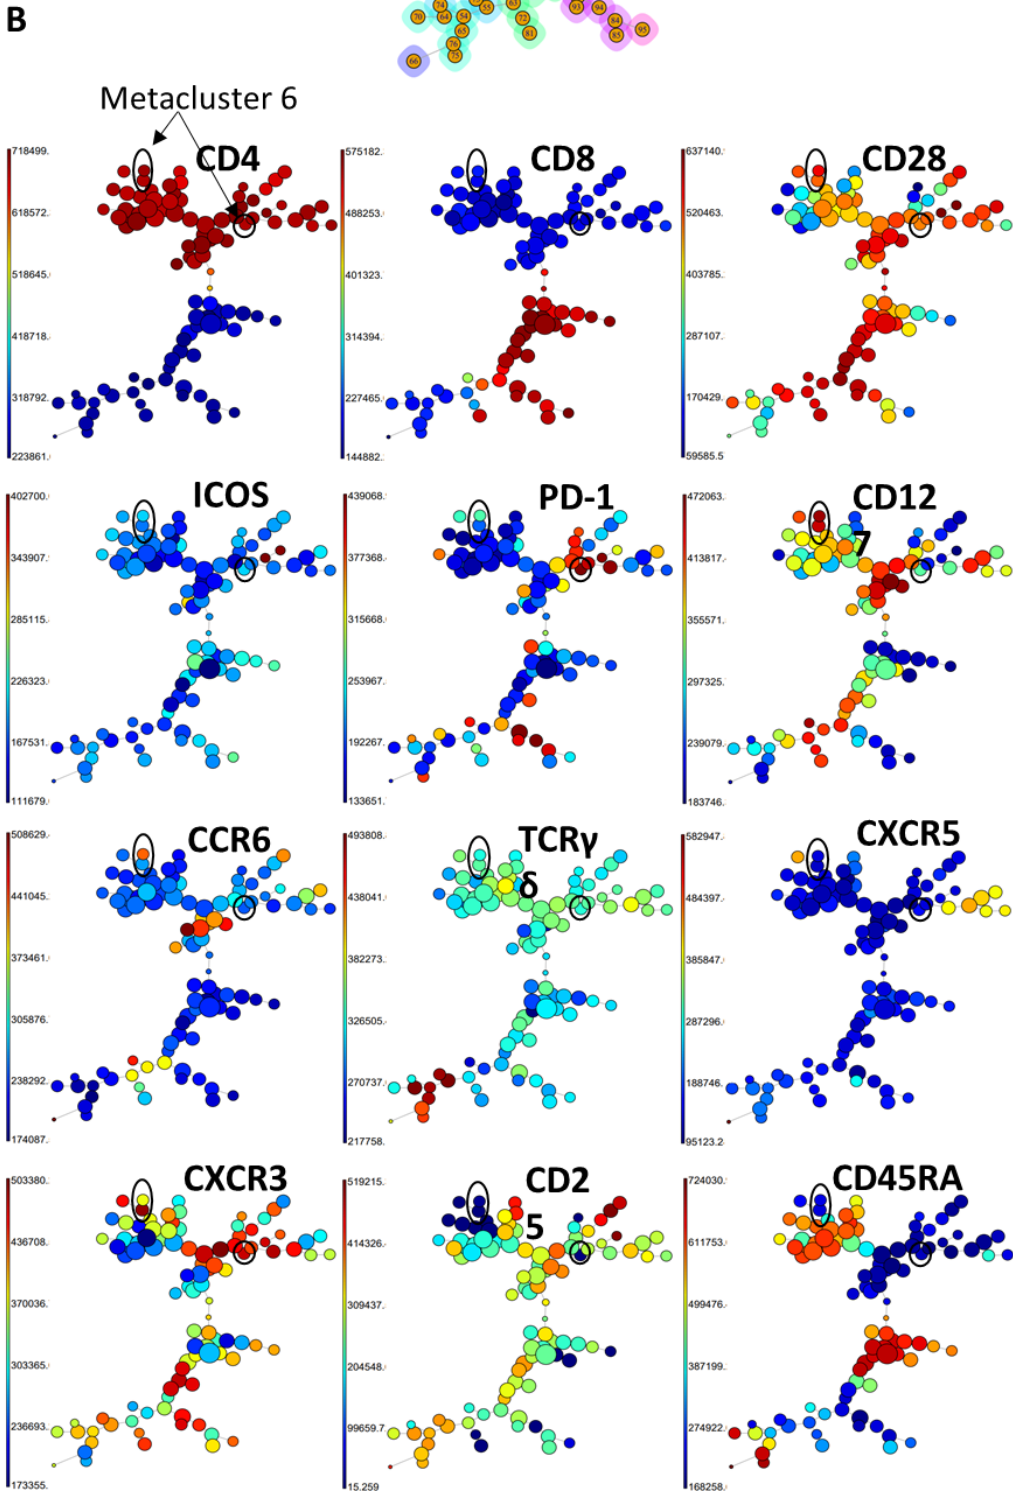

**Figure S5.** Tree graphical representation of the FlowSOM analysis of the Tfh–T $\gamma$  $\delta$  cell cytometry panel. **(A)** Tree graphical representation of the 15 metaclusters detected by FlowSOM analysis, with each metacluster in a different color. Clusters 13, 31, and 52 were identified in metacluster 6 and were more abundant in the CT group than in the COV group. **(B)** Tree graphical representation showing the expression of all the markers of the Tfh–T $\gamma$  $\delta$  cell panel (CD4, CD8, CD28, ICOS, PD-1, CD127, CCR6, TCR $\gamma$  $\delta$ , CXCR5, CXCR3, CD25, and CD45RA), obtained by FlowSOM analysis. Clusters 13, 31 and 52 are bounded with black circles. The color scale (left axis) represents the intensity of the marker's expression, with dark red for high expression and dark blue for no expression.



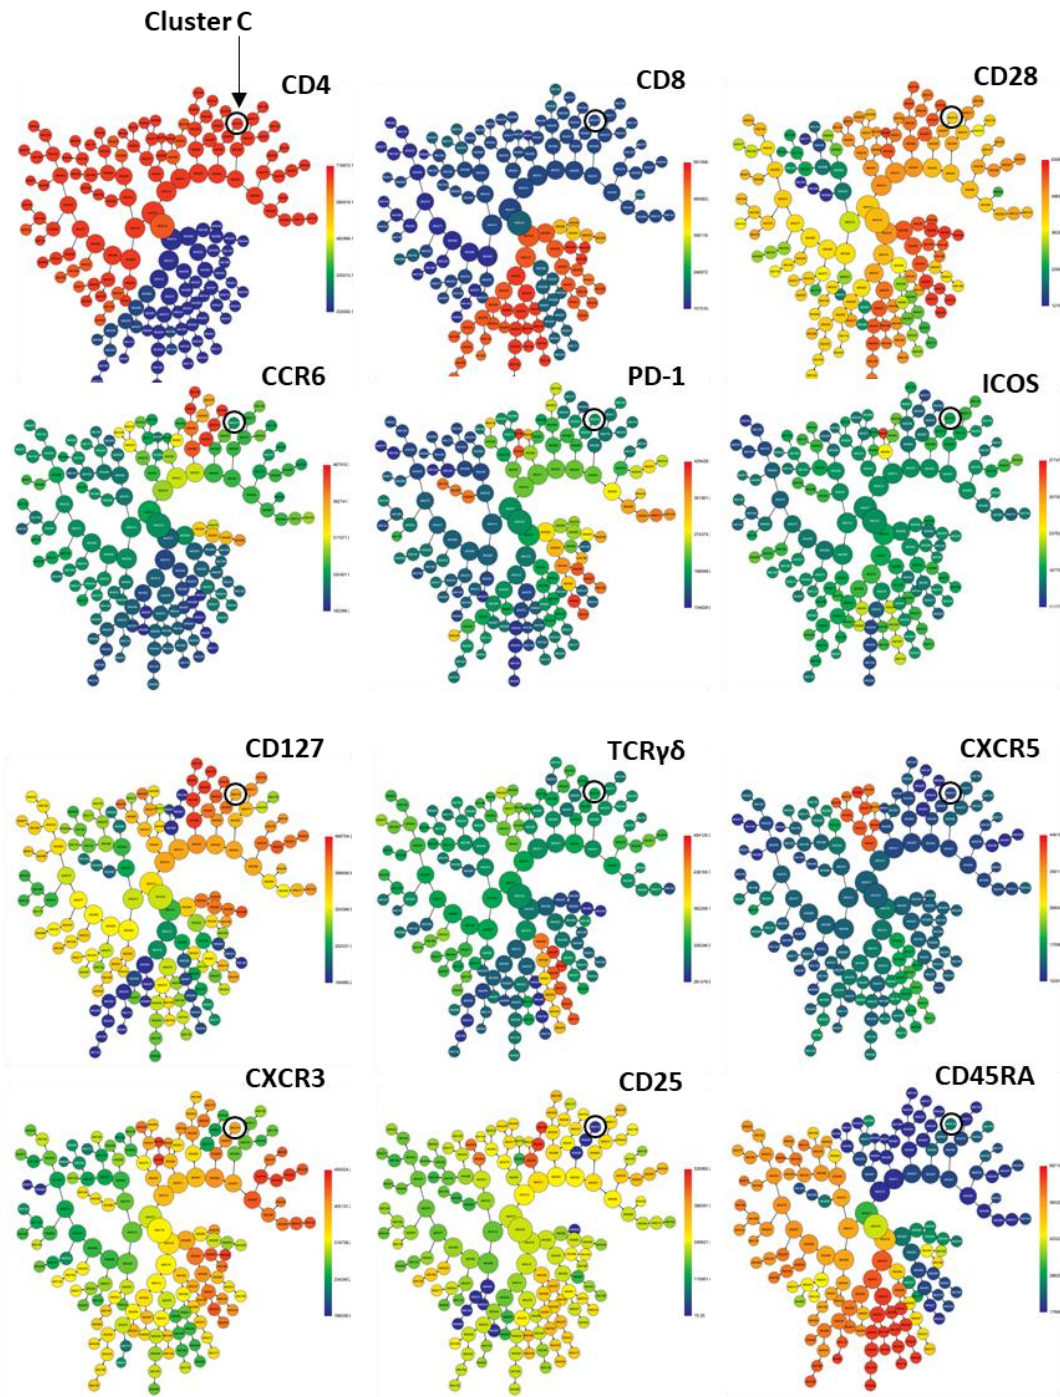

**Figure S6.** Graphics from CITRUS analysis of the Tfh-T $\gamma\delta$  cell cytometry panel. Cluster C, depicted by a black circle, was significantly more abundant in the CT group than in the COV group, as determined by CITRUS analysis. Tree graphical representation showing the expression of all the markers of the Tfh-T $\gamma\delta$ -cell panel (CD4, CD8, CD28, ICOS, PD-1, CD127, CCR6, TCR $\gamma\delta$ , CXCR5, CXCR3, CD25, and CD45RA). The color scale (right axis) represents the intensity of the marker's expression, with dark red for high expression and dark blue for no expression. Cluster C was determined to be CD4<sup>+</sup> CD28<sup>+</sup> CD127<sup>+</sup> CXCR3<sup>+</sup>.

## Supplemental S7

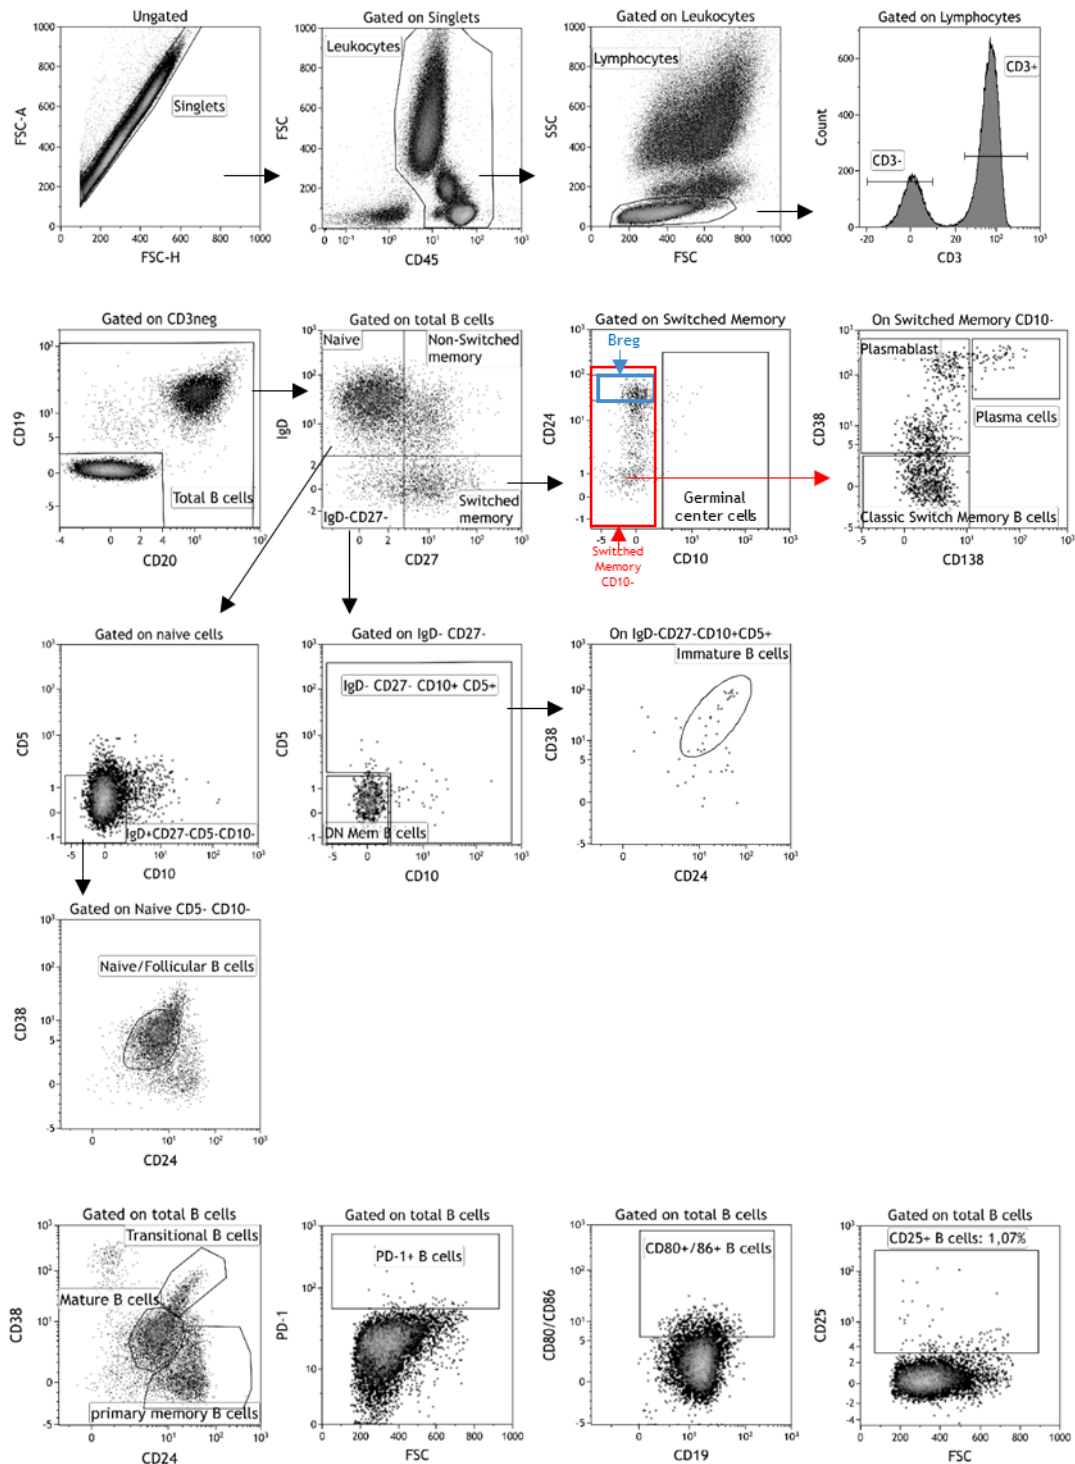

**Figure S7.** Traditional manual gating strategy for the analysis of the B-cell panel. Gating strategies to define B-cell subsets used in COV and CT group individuals. Representative examples of flow cytometry plots determined on whole blood labeled from one individual. The blue rectangle defines the Breg population, and the red rectangle the Switched memory CD10neg.

Supplemental S8

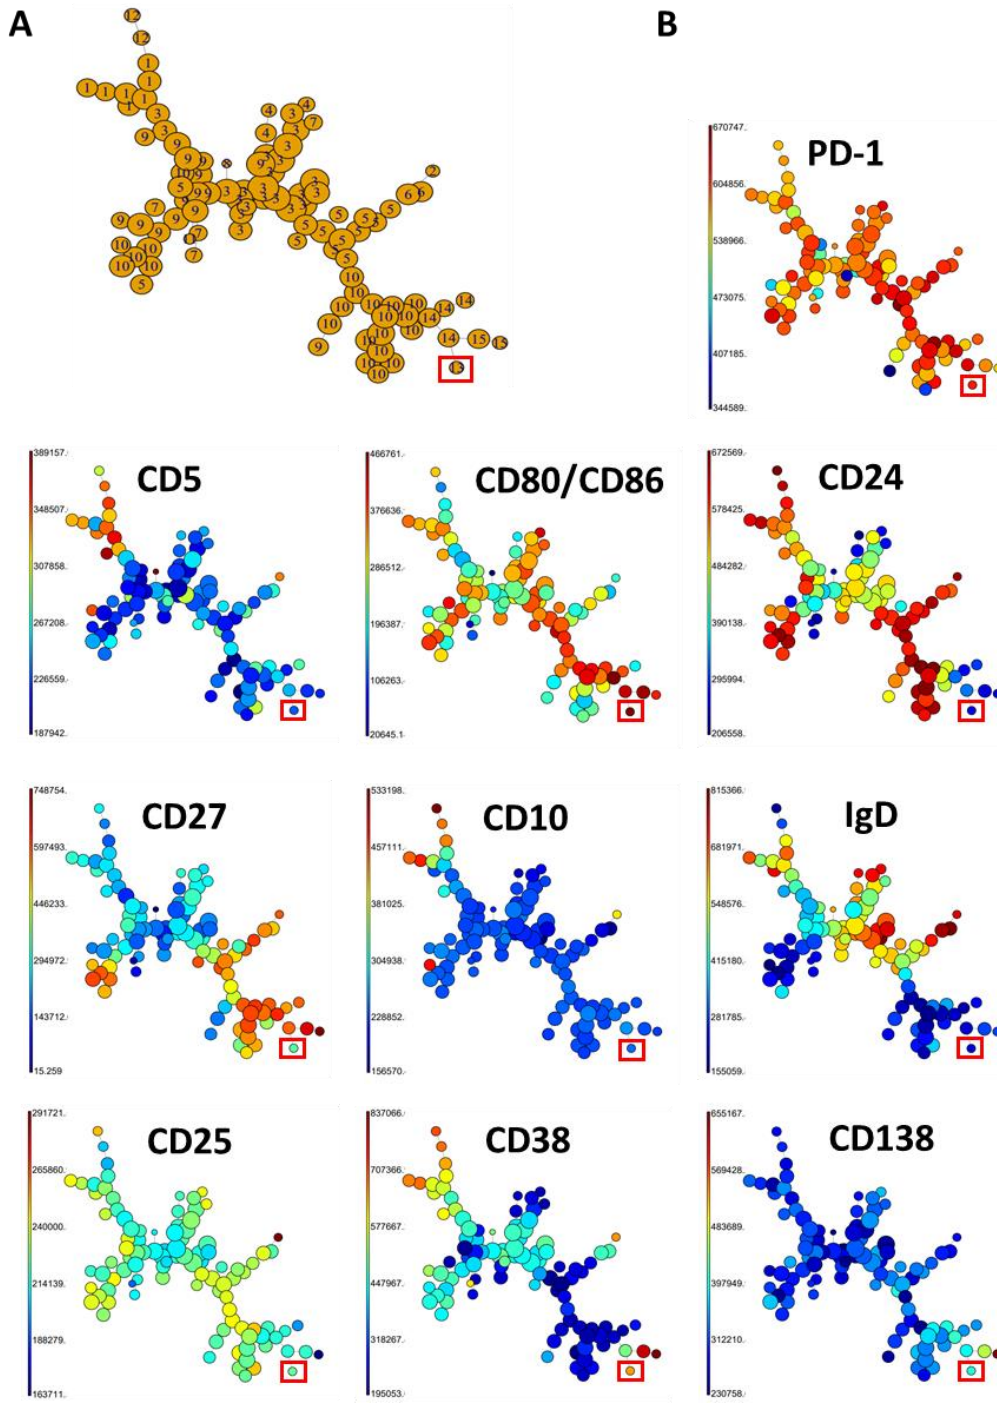

**Figure S8.** High-dimensional analysis of the B cell cytometry panel. (A) Tree graphical representation for the 15 metaclusters obtained by the FlowSOM analysis. Metacluster 13, depicted with a red square, was determined by a FlowSOM analysis as being significantly different between the CT and COV groups. (B) Tree graphical representation showing the expression of all the markers of the B-cell panel (PD-1, CD5, CD80/CD86, CD24, CD27, CD10, IgD, CD25, CD38, and CD138). The color scale (left axis) represents the intensity of the marker's expression, with dark red for high expression and dark blue for no expression. The red square indicates metacluster 13, expressing CD19<sup>+</sup> CD20<sup>+</sup> CD80/CD86<sup>+</sup> CD38<sup>+</sup>.

Supplemental S9

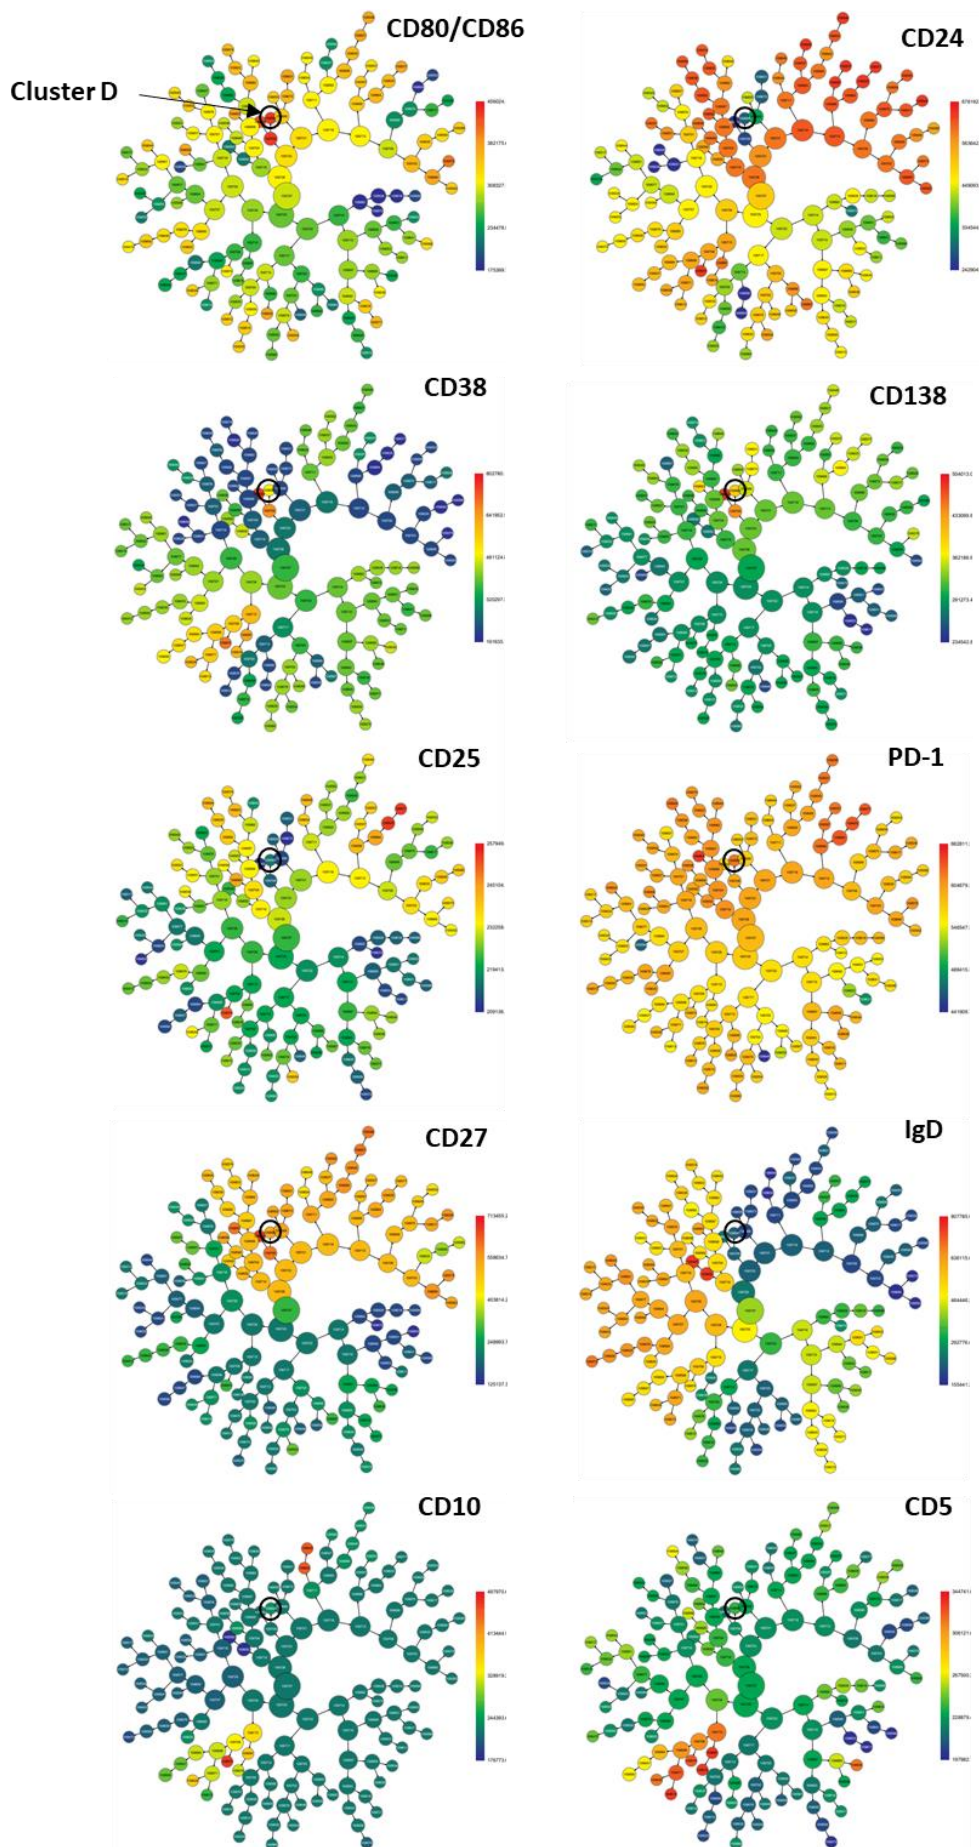

**Figure S9.** Graphics from CITRUS analysis of the B-cell cytometry panel. Tree graphical representation of clusters determined by CITRUS analysis. Cluster D, depicted as a black circle, was more abundant in the COV group than in the CT group. Markers' intensities are depicted by a color scale (right axis), with dark red for high expression and dark blue for no expression. We identified that cluster D was defined as CD80/CD86+ CD27+ CD38+ CD138+ PD-1+.

## Supplemental S10

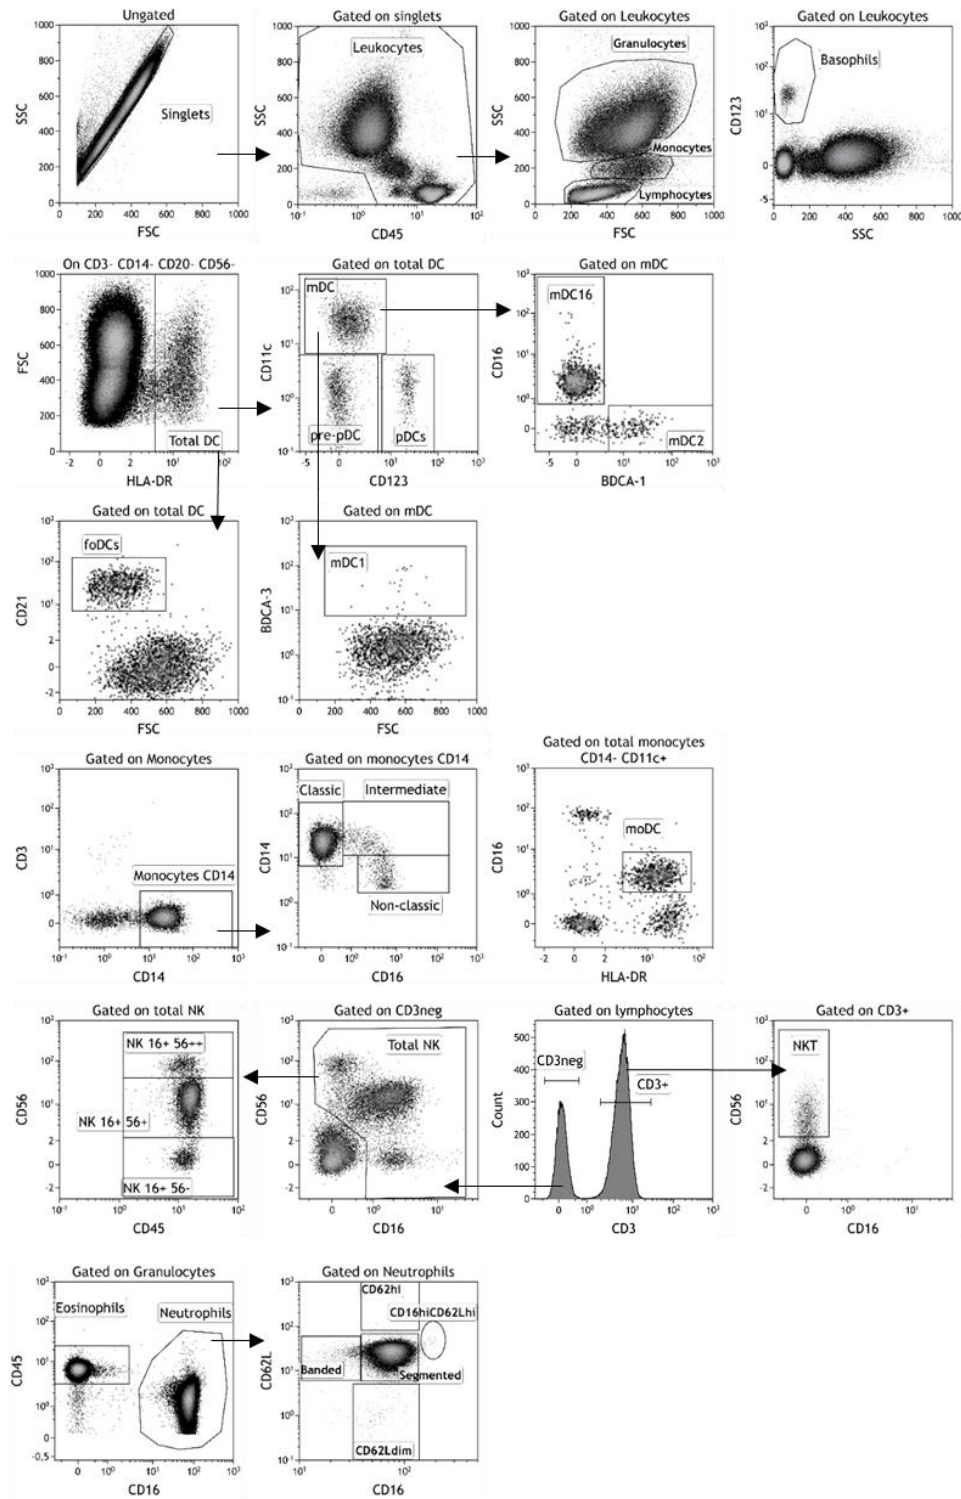

**Figure S10.** Traditional manual gating strategy for the analysis of the innate immune cells' panel. Gating strategies to define innate immune cells' subsets used in COV and CT group individuals. Representative examples of flow cytometry plots determined on whole blood labeled from one individual.

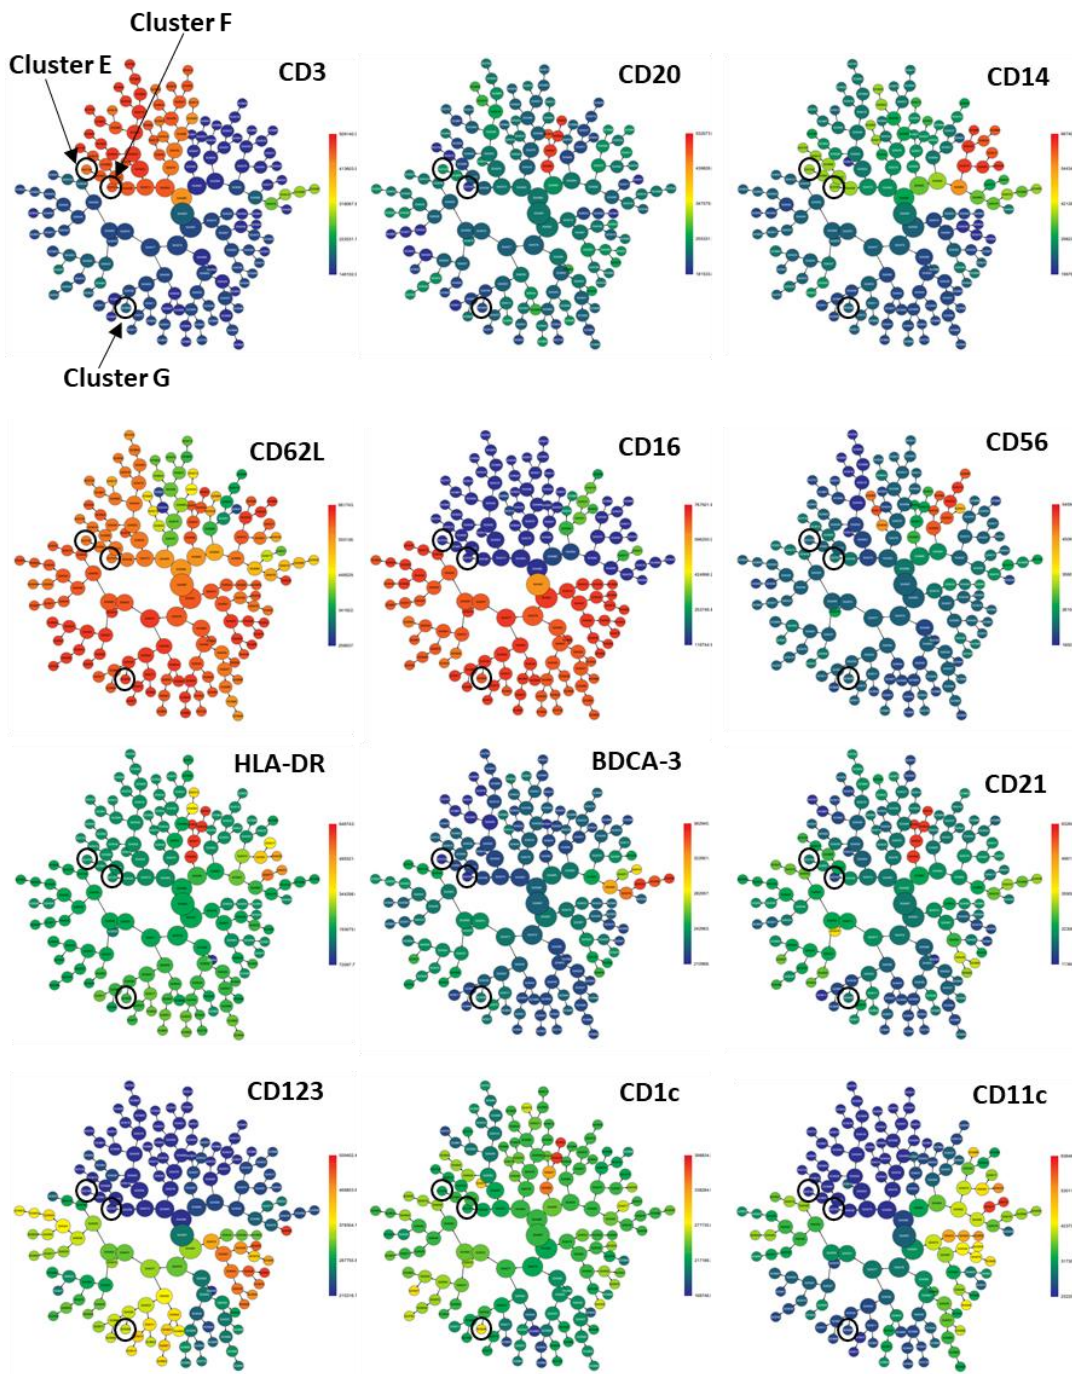

**Figure S11.** Graphics from CITRUS analysis of the innate cell cytometry panel. Tree graphical representation of clusters determined by CITRUS analysis. Clusters E, F, and G, depicted by black circles, were more abundant in the COV group than in the CT group. Markers' intensities for CD62L, CD16, CD56, HLA-DR, BDCA-3, CD21, CD123, CD1c, and CD11c are depicted by a color scale (right axis), with dark red for high expression and dark blue for no expression. We identified that clusters E and F expressed almost the same markers, CD14<sup>+</sup> CD3<sup>+</sup> CD62L<sup>+</sup>. Cluster G was HLA-DR<sup>neg</sup> CD11c<sup>neg</sup> CD62L<sup>+</sup> CD16<sup>+</sup> CD123<sup>+</sup> CD1c<sup>int</sup>.

Table S1

| Antibody               | Fluorescence    | Panel                         |
|------------------------|-----------------|-------------------------------|
| BDCA-3                 | FITC            | Innate cells                  |
| CCR10                  | APC             | B-cells                       |
| CCR4                   | BV605           | T-cells                       |
| CCR6                   | PE-Vio615       | T-cells                       |
|                        |                 | Tfh-T $\gamma$ $\delta$ cells |
| CD10                   | PE-Vio770       | B-cells                       |
| CD11c                  | APC5            | Innate cells                  |
| CD123                  | APC-Vio770      | Innate cells                  |
| CD127                  | PE              | T-cells                       |
|                        |                 | Tfh-T $\gamma$ $\delta$ cells |
| CD138                  | APC             | B-cells                       |
| CD14                   | Vioblue         | Innate cells                  |
| CD16                   | PE-Vio770       | Innate cells                  |
| CD19                   | PE-Vio615       | B-cells                       |
| CD1c                   | APC             | Innate cells                  |
| CD20                   | PerCP           | B-cells                       |
|                        |                 | Innate cells                  |
| CD21                   | PE              | Innate cells                  |
| CD24                   | VioGreen        | B-cells                       |
| CD25                   | PE-Vio770       | T-cells                       |
|                        | APC-Fire750     | B-cells                       |
|                        | APC-R700        | Tfh-T $\gamma$ $\delta$ cells |
| CD27                   | PerCP-Vio700    | T-cells                       |
| CD28                   | BV570           | Tfh-T $\gamma$ $\delta$ cells |
| CD3                    | VioGreen        | T-cells                       |
|                        | VioGreen        | Tfh-T $\gamma$ $\delta$ cells |
|                        | BV605           | B-cells                       |
|                        | VioGreen        | Innate cells                  |
| CD38                   | BV650           | T-cells                       |
|                        | APC             | B-cells                       |
| CD4                    | VioBlue         | T-cells                       |
|                        | VioBlue         | Tfh-T $\gamma$ $\delta$ cells |
| CD45                   | PE-Cy5          | T-cells                       |
|                        | PE-Cy5          | Tfh-T $\gamma$ $\delta$ cells |
|                        | BV570           | B-cells                       |
|                        | BV570           | Innate cells                  |
| CD45RA                 | APC-Vio770      | B-cells                       |
|                        |                 | Tfh-T $\gamma$ $\delta$ cells |
| CD5                    | FITC            | B-cells                       |
| CD56                   | PE-Vio615       | Innate cells                  |
| CD62L                  | BV650           | Innate cells                  |
| CD80                   | BV650           | B-cells                       |
| CD86                   | BV650           | B-cells                       |
| CD8a                   | BV570           | T-cells                       |
|                        |                 | Tfh-T $\gamma$ $\delta$ cells |
| CXCR3                  | VioBright       | T-cells                       |
|                        | APC             | Tfh-T $\gamma$ $\delta$ cells |
|                        | PE-Vio770       | Tfh-T $\gamma$ $\delta$ cells |
| HLA-DR                 | Alexa Fluor 700 | B-cells                       |
|                        | PerCP-Vio700    | NK-DC                         |
| ICOS                   | BV605           | Tfh-T $\gamma$ $\delta$ cells |
| IgD                    | PE              | B-cells                       |
| PD-1                   | VioBright 515   | Tfh-T $\gamma$ $\delta$ cells |
|                        | BV421           | B-cells                       |
| TCR- $\gamma$ $\delta$ | PerCP-Vio700    | Tfh-T $\gamma$ $\delta$ cells |

**Table S1:** Antibodies used in the four cytometry panels. For each antibody, the fluorochrome and panel where it was used is indicated.
